# Supplementary material
Source: Springer Nature journal article supplement (https://www.springermedizin.de/resource/supplementary/12985_2014_2446_MOESM3_ESM.pdf/9606748)
Supplement: MOESM3 [file 9606748]

A

|           |                          |    |
|-----------|--------------------------|----|
| TBEV74    | GRKTASFTVSSEKTILTM-----  | 18 |
| TBEV74/38 | ----ASFTVSSEKTILTMGEYG-- | 18 |

---

|          |                          |    |
|----------|--------------------------|----|
| OHFV     | GRKTALFTVSSEKTILTM-----  | 18 |
| LIV      | GRKTATFTVSSEKTILTL-----  | 18 |
| LGTV     | GRKSASFTVSSEKTILTL-----  | 18 |
| USUV     | --QAGRFTITPNSPAITVKM---- | 18 |
| MVEV     | --QAVRFTISPNAPAITAKM---- | 18 |
| WNV_NY   | --QAGRESITPAAPSYTLKL---- | 18 |
| WNV_Rabv | --QAGRFTVSPSAPTYTMKL---- | 18 |
| JEV      | --QAAKFTITPNAPSITLKL---- | 18 |
| YFV      | -DRPAEVRKVCYNAVLTHV----- | 18 |
| DENV1    | --HGTIATITPQAPTSEIQL---- | 18 |
| DENV2    | --HGKEIKITPQSSITEAEL---- | 18 |
| DENV3    | --QGVTAEITSQASTAEAIL---- | 18 |
| DENV4    | --HGVTATITPRSPSVEVKL---- | 18 |

B

|           |                         |    |
|-----------|-------------------------|----|
| TBEV85    | --LPWKHEGAQ---NWNNAERLV | 18 |
| TBEV85/59 | LALPWKHEGAQ---NWNNAER-- | 18 |

---

|          |                          |    |
|----------|--------------------------|----|
| USUV     | --LPWTSPASS---NWRNREILL  | 18 |
| OHFV     | --LPWKHEGMV---GWNNNAERLV | 18 |
| LIV      | --LPWKHDGNP---HWNNNAERLV | 18 |
| LGTV     | --LPWKHDGAE---AWNEAGRLLV | 18 |
| MVEV     | --LPWTSPAST---EWRNREILV  | 18 |
| WNV_Rabv | --MPWSSAAGT---AWRNRETLM  | 18 |
| WNV_NY   | --LPWSSAGST---VWRNRETLM  | 18 |
| JEV      | --LPWTSPSST---AWRNRELLM  | 18 |
| YFV      | --LPWQSGSGG---VWREMHHLV  | 18 |
| DENV1    | --LPWTSGASTSQETWNRQDLLV  | 21 |
| DENV2    | --LPWLPGADTQGSNWIQKETLV  | 21 |
| DENV3    | --LPWTSGATTKTPTWNRKELLV  | 21 |
| DENV4    | --LPWAAGADTSEVHWNYKERMV  | 21 |

: \*\* . \*

C

|             |                       |    |
|-------------|-----------------------|----|
| TBEV521     | ALNTLTNIKVQLIRMMEG--- | 18 |
| TBEV521/198 | --NTLTNIKVQLIRMMEGEG- | 18 |
| DENV3       | GLNTFTNMEAQLIRQMEG--- | 18 |

---

|          |                        |    |
|----------|------------------------|----|
| OHFV     | ALNTLTNIKVQLIRMMEG---  | 18 |
| LIV      | ALNTLTNIKVQSTRMMEG---  | 18 |
| LGTV     | ALNTITNIKVQLVRRMMEG--- | 18 |
| MVEV     | ALNTFTNIAVQLVRLMEA---  | 18 |
| USUV     | ALNTFTNIAVQLIRLMEA---  | 18 |
| WNV_Rabv | ALNTFTNLAVQLVRRMMEG--- | 18 |
| WNV_NY   | ALNTFTNLAVQLVRRMMEG--- | 18 |
| JEV      | ALNTFTNIAVQLVRLMEA---  | 18 |
| YFV      | ALNTITNLKVQLIRMAEA---  | 18 |
| DENV1    | GLNTFTNMEAQLIRQMES---  | 18 |
| DENV2    | GLNTFTNMEAQLIRQMEG---  | 18 |
| DENV4    | GLNTFTNMEVQLIRQMEA---  | 18 |

\*\* : \*\* : \* \* \*
